# Supplementary material for: pH-Responsive Cellulose/Silk/Fe3O4 Hydrogel Microbeads Designed for Biomedical Applications
Source: MDPI journal article supplement (doi:10.3390/gels10030200), 2024-03-16
Supplement: s1 [file s1]

# **pH-Responsive cellulose/silk/Fe<sub>3</sub>O<sub>4</sub> hydrogel microbeads designed for biomedical applications**

Seung Hyeon Weon<sup>†</sup>, Yuhyeon Na<sup>†</sup>, Jiwoo Han, Jeong Woo Lee, Hyung Joo Kim, Saerom Park\* and Sang Hyun Lee\*

Department of Biological Engineering, Konkuk University, Seoul 05029, Republic of Korea.

## **\*Corresponding authors:**

Saerom Park

Tel.: +82-10-4038-4656

E-mail: [angel4y@naver.com](mailto:angel4y@naver.com)

Sang Hyun Lee

Tel.: +82-2-2049-6269

Fax: +82-2-457-8895

E-mail: [sanghlee@konkuk.ac.kr](mailto:sanghlee@konkuk.ac.kr)

<sup>†</sup> Seung Hyeon Weon and Yuhyeon Na equally contributed to this study.

**Table S1.** Kinetic parameters of BSA adsorption on cellulose-based hydrogel microbeads.

| Solvent | Silk content (%) | Pseudo-first-order model |                             |       | $q_{e, \text{exp.}}$ (mg/g) |
|---------|------------------|--------------------------|-----------------------------|-------|-----------------------------|
|         |                  | $k_1$ (1/min)            | $q_{e, \text{cal.}}$ (mg/g) | $R^2$ |                             |
| TBAH    | 0                | 1.57                     | 250.3                       | 0.945 | 184.0                       |
|         | 1                | -1.93                    | 14.0                        | 0.691 | 507.6                       |
| TBPH    | 0                | -0.48                    | 23.9                        | 0.603 | 207.9                       |
|         | 1                | -2.24                    | 12.0                        | 0.799 | 569.7                       |

**Table S2.** Comparison of adsorption capacities of cellulose-based microbeads for BSA.

| Adsorbent                                                         | Adsorbate | $q_{\max}$ (mg/g) | Reference |
|-------------------------------------------------------------------|-----------|-------------------|-----------|
| Cellulose beads                                                   | BSA       | 204.6             | [43]      |
| Cellulose/agarose composite microspheres                          | BSA       | 307.6             | [44]      |
| Diethylaminoethyl-modified cellulose microspheres                 | BSA       | 409.5             | [45]      |
| Cellulose/silk/Fe <sub>3</sub> O <sub>4</sub> hydrogel microbeads | BSA       | 1643.1            | This work |

**Table S3.** Isotherm parameters of BSA adsorption on cellulose/silk/Fe<sub>3</sub>O<sub>4</sub> hydrogel microbeads.

| Solvent | Silk<br>Content<br>(%) | Freundlich Model |      |                | Elovich Model                     |                 |                |
|---------|------------------------|------------------|------|----------------|-----------------------------------|-----------------|----------------|
|         |                        | $k_f$<br>(mg/g)  | n    | R <sup>2</sup> | $k_E$<br>( $\times 10^{-2}$ L/mg) | $q_m$<br>(mg/g) | R <sup>2</sup> |
| TBAH    | 0                      | 40.46            | 4.02 | 0.848          | 17.80                             | 58.3            | 0.780          |
|         | 1                      | 14.20            | 1.75 | 0.985          | 0.25                              | 810.5           | 0.941          |
| TBPH    | 0                      | 37.45            | 3.64 | 0.872          | 14.75                             | 66.1            | 0.792          |
|         | 1                      | 7.38             | 1.38 | 0.973          | 0.09                              | 2244.8          | 0.755          |

**Table S4.** Kinetic parameters of BSA release from cellulose/silk/Fe<sub>3</sub>O<sub>4</sub> microbeads.

| Solvent | pH  | Zero-Order Model |                | First-Order Model |                | Higuchi Model  |                |
|---------|-----|------------------|----------------|-------------------|----------------|----------------|----------------|
|         |     | K <sub>0</sub>   | R <sup>2</sup> | K <sub>1</sub>    | R <sup>2</sup> | K <sub>H</sub> | R <sup>2</sup> |
| TBAH    | 2.2 | 0.19             | 0.628          | 0.002             | 0.813          | 1.44           | 0.764          |
|         | 7.4 | 0.29             | 0.879          | 0.039             | 0.897          | 2.63           | 0.977          |
| TBPH    | 2.2 | 0.33             | 0.813          | 0.004             | 0.824          | 2.44           | 0.941          |
|         | 7.4 | 0.10             | 0.781          | 0.035             | 0.957          | 9.39           | 0.925          |

Zero-order model:  $Q_t = K_0 \cdot t$ ,

First-order model:  $\log C = \log C_0 - \frac{K_1 t}{2.303}$ ,

Higuchi model:  $Q_t = K_H \cdot t^{0.5}$ ,

where  $Q_t$  is the cumulative amount of released protein;  $K_0$  is the zero-order rate constant;  $C$  is the percentage of remaining protein;  $K_1$  is the first-order rate constant;  $K_H$  is the Higuchi constant; and  $t$  is time (h).

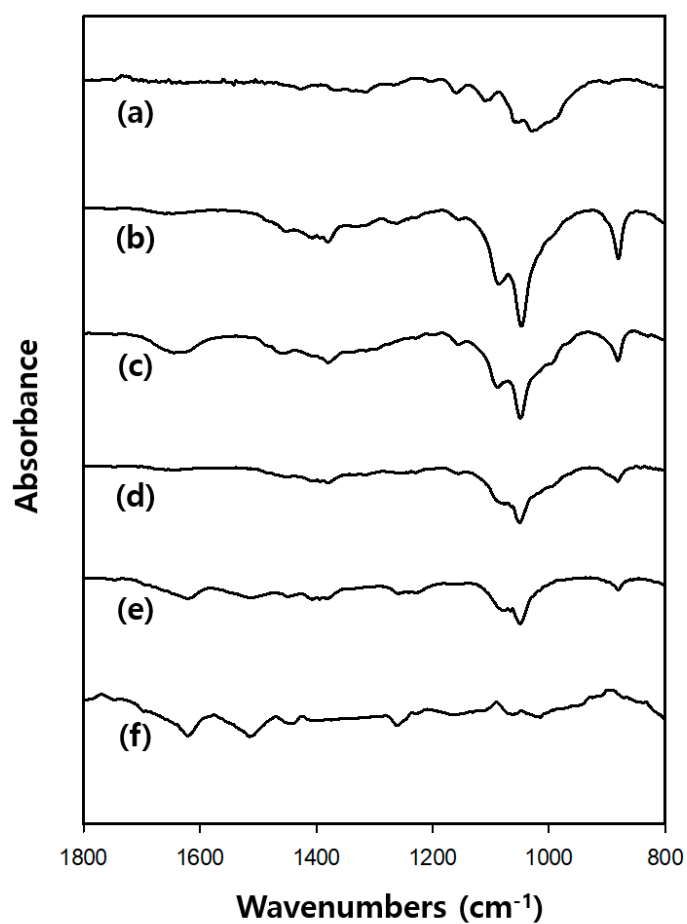

**Figure S1.** FT-IR spectra of MCC (a), regenerated cellulose with TBAH (b), regenerated cellulose/silk with TBAH (c), regenerated cellulose with TBPH (d), regenerated cellulose/silk with TBPH (e), and degummed silk (f).

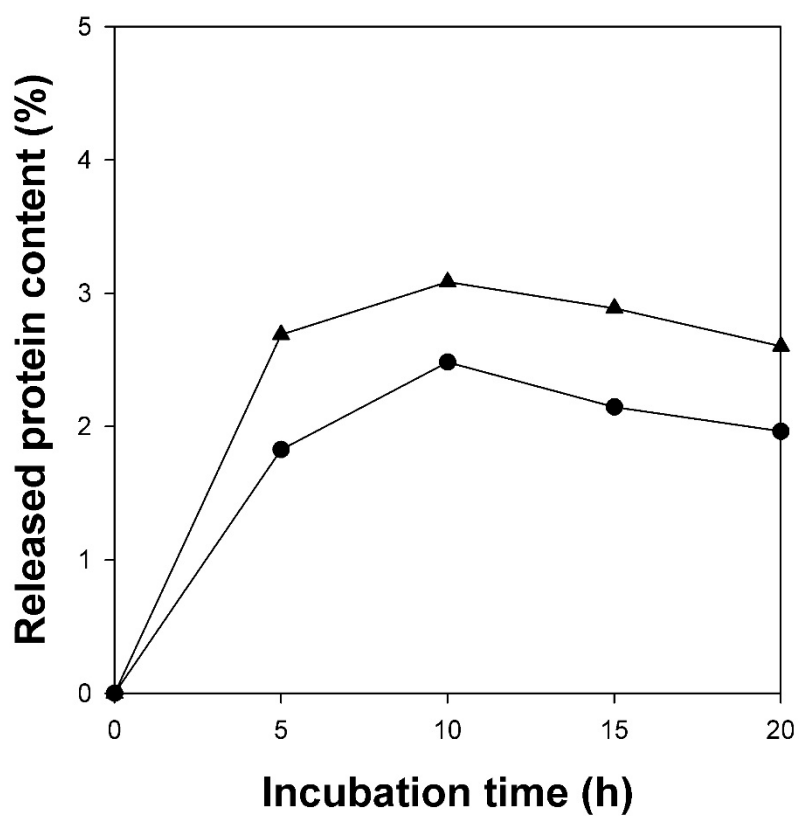

**Figure S2.** Storage stability of cellulose/silk/ $\text{Fe}_3\text{O}_4$  hydrogel microbeads at 25°C. Circle symbols (TBAH) and triangle symbols (TBPH) represent the solvents used to prepare microbeads. The contents of cellulose, silk, and  $\text{Fe}_3\text{O}_4$  in the microbead-preparing solution were 4%, 1%, and 0.5%, respectively.

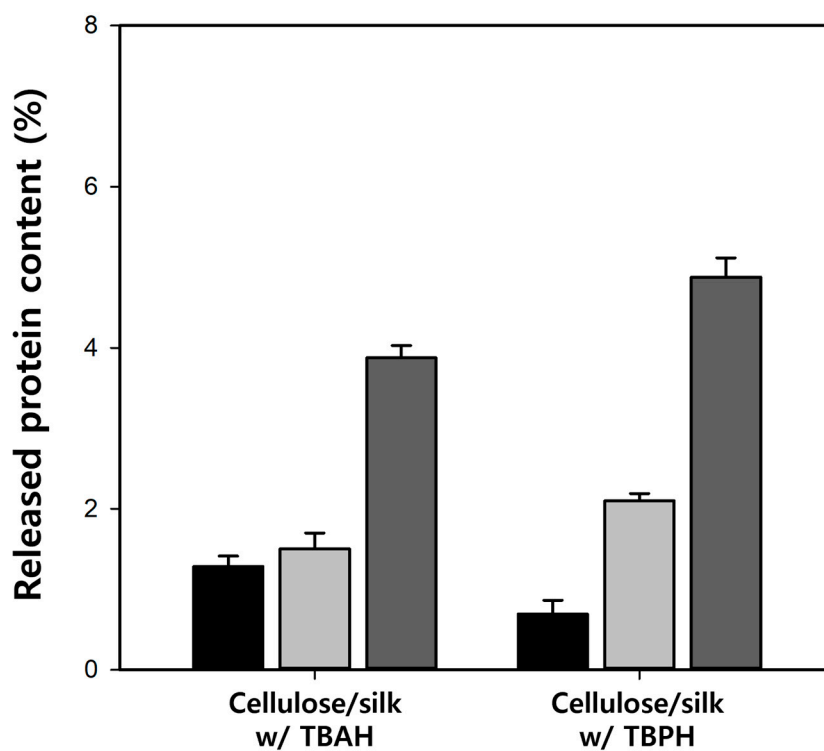

**Figure S3.** Thermal stability of cellulose/silk/ $\text{Fe}_3\text{O}_4$  hydrogel microbeads after 24 h incubation. Black, gray, and dark gray bars represent the incubation temperatures of 35°C, 45°C, and 55°C, respectively. The contents of cellulose, silk, and  $\text{Fe}_3\text{O}_4$  in the microbead-preparing solution were 4%, 1%, and 0.5%, respectively.
